# Supplementary figures and images for: Retroelement—Linked Transcription Factor Binding Patterns Point to Quickly Developing Molecular Pathways in Human Evolution
Source: MDPI journal article supplement (doi:10.3390/cells8020130), 2019-02-06

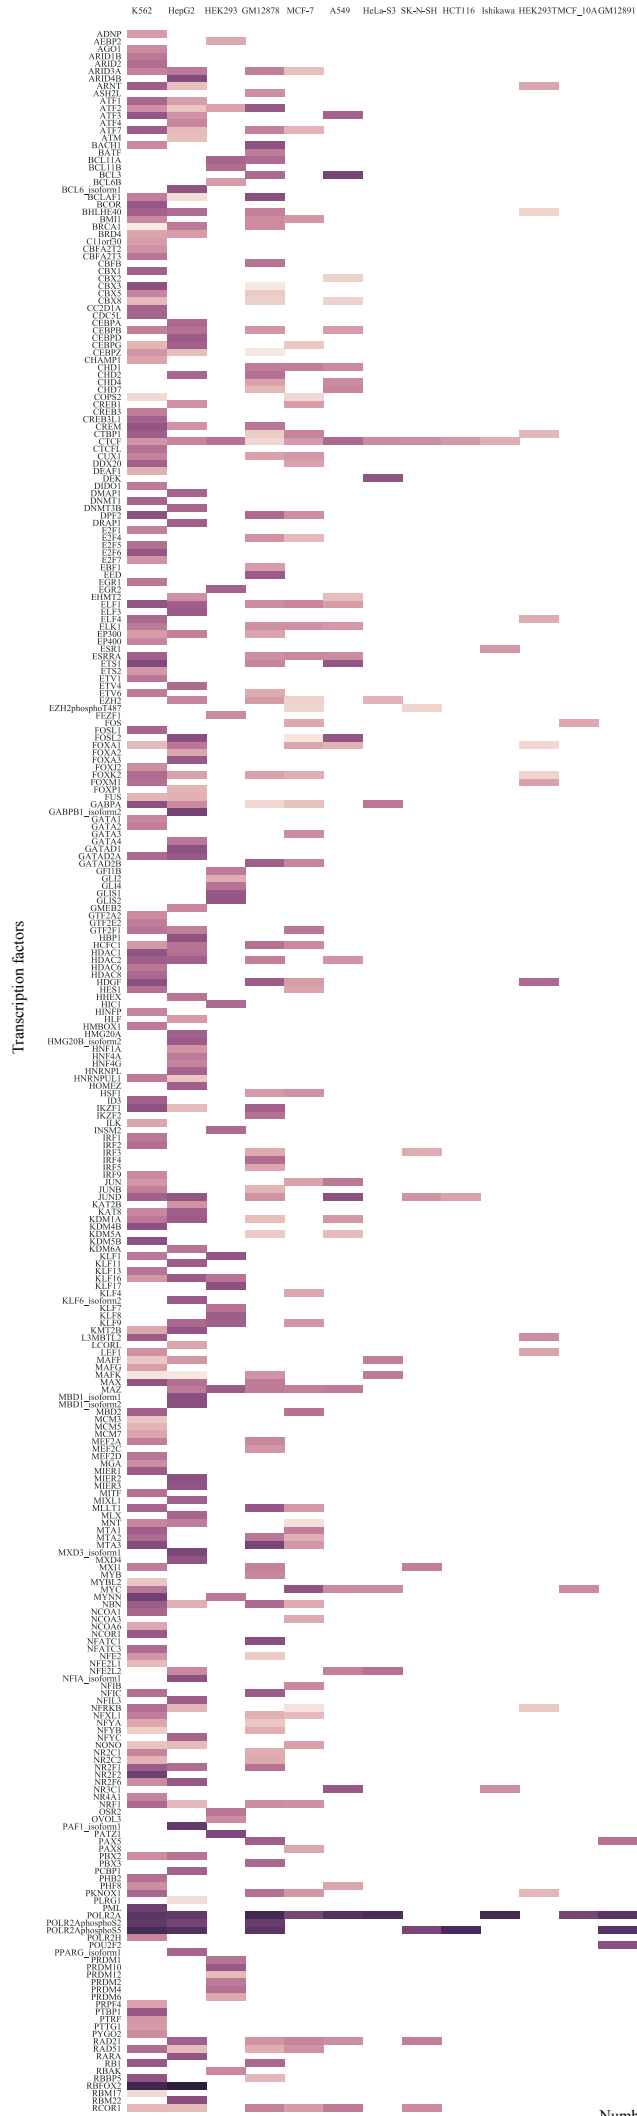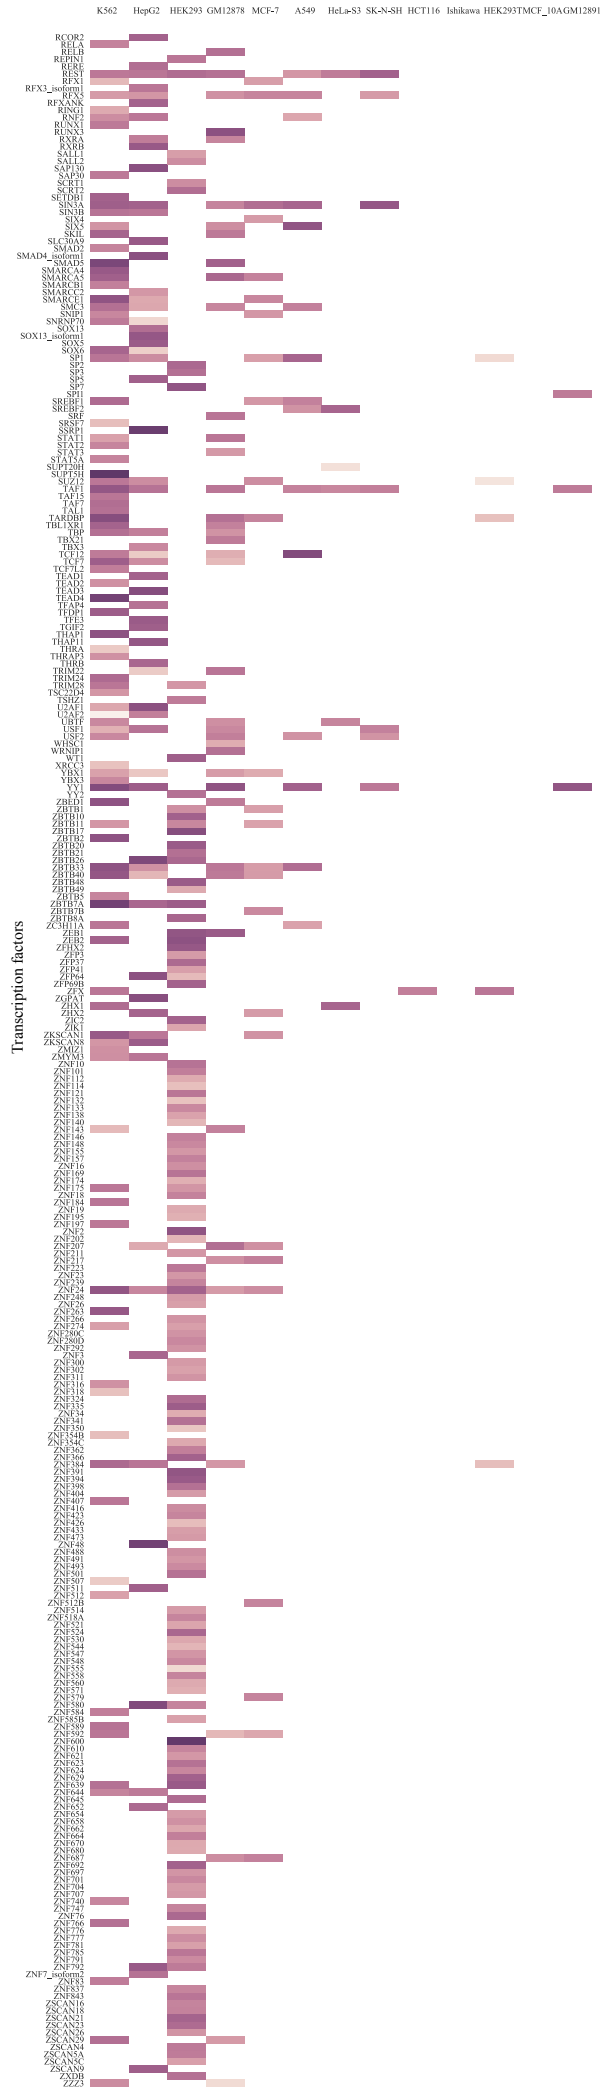

Supplement: s1 [file s1]
